# Supplementary material
Source: PubMed Central journal article supplement (PMC3910103)
Supplement: NIHMS542608-supplement-1_si_001.pdf [file NIHMS542608-supplement-1_si_001.pdf]

## SUPPORTING INFORMATION

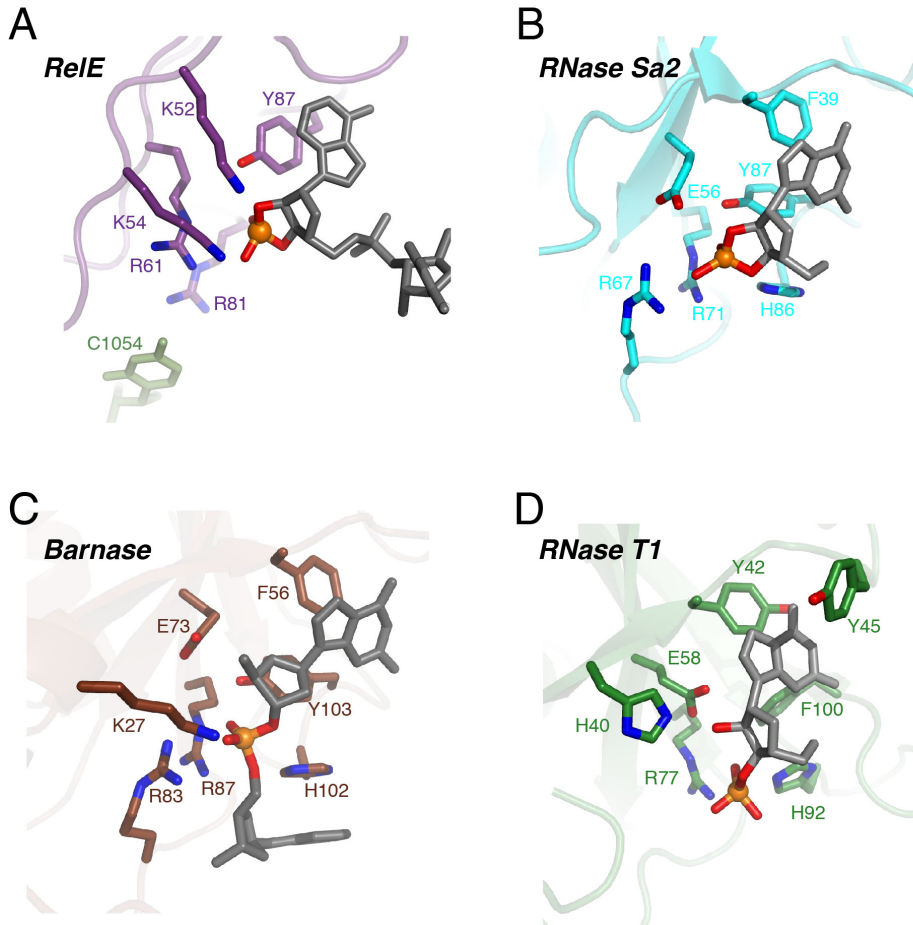

**Figure S1. Comparison of RelE active-site structure and composition with other RNases.**

(A) RelE in the post-cleavage structure with ribosomal-bound mRNA (PDB ID: 3KIU). (B) RNase Sa2 with guanosine 2',3'-cylcophosphorothioate (PDB ID: 3D5I) (C) Barnase, with deoxy-guanosine-deoxy-adenosine (PDB ID: 1BRN), and (D) RNase T1 with 3'-guanosine-monophosphate (PDB ID: 1RGA). RNase proteins are shown in cartoon representation, with important active-site residues depicted as sticks. Heteroatoms near the scissile phosphate are colored: nitrogen (blue), hydrogen (red). Bound substrates are shown in dark grey sticks for each RNase, with important heteroatoms colored: oxygen (red), phosphate (orange).

*Bacterial toxin RelE: A highly efficient nuclease with exquisite substrate specificity using atypical catalytic residues*

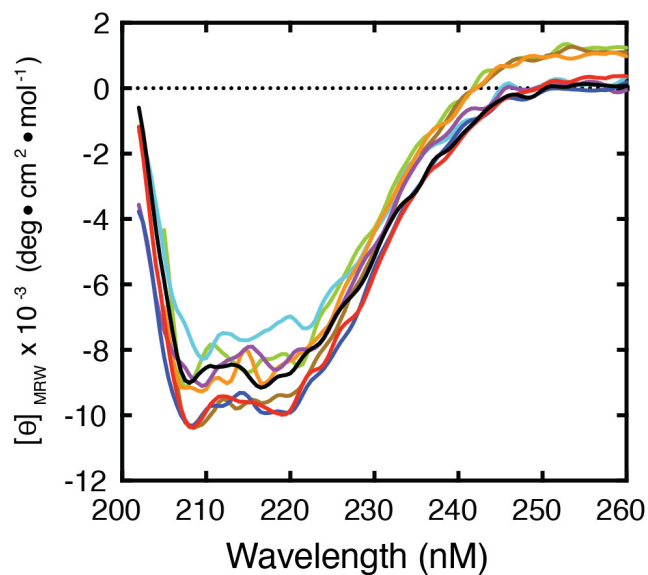

**Figure S2. Far-UV circular dichroism analysis of RelE proteins.** Wavelength scans collected from 202 - 260 nm at 4 °C for RelE proteins wild-type, black; K52A, light purple; K54A, orange; R61A, red; R81A, light green; Y87F, light blue; Y87A, brown; K52A/Y87F, blue.

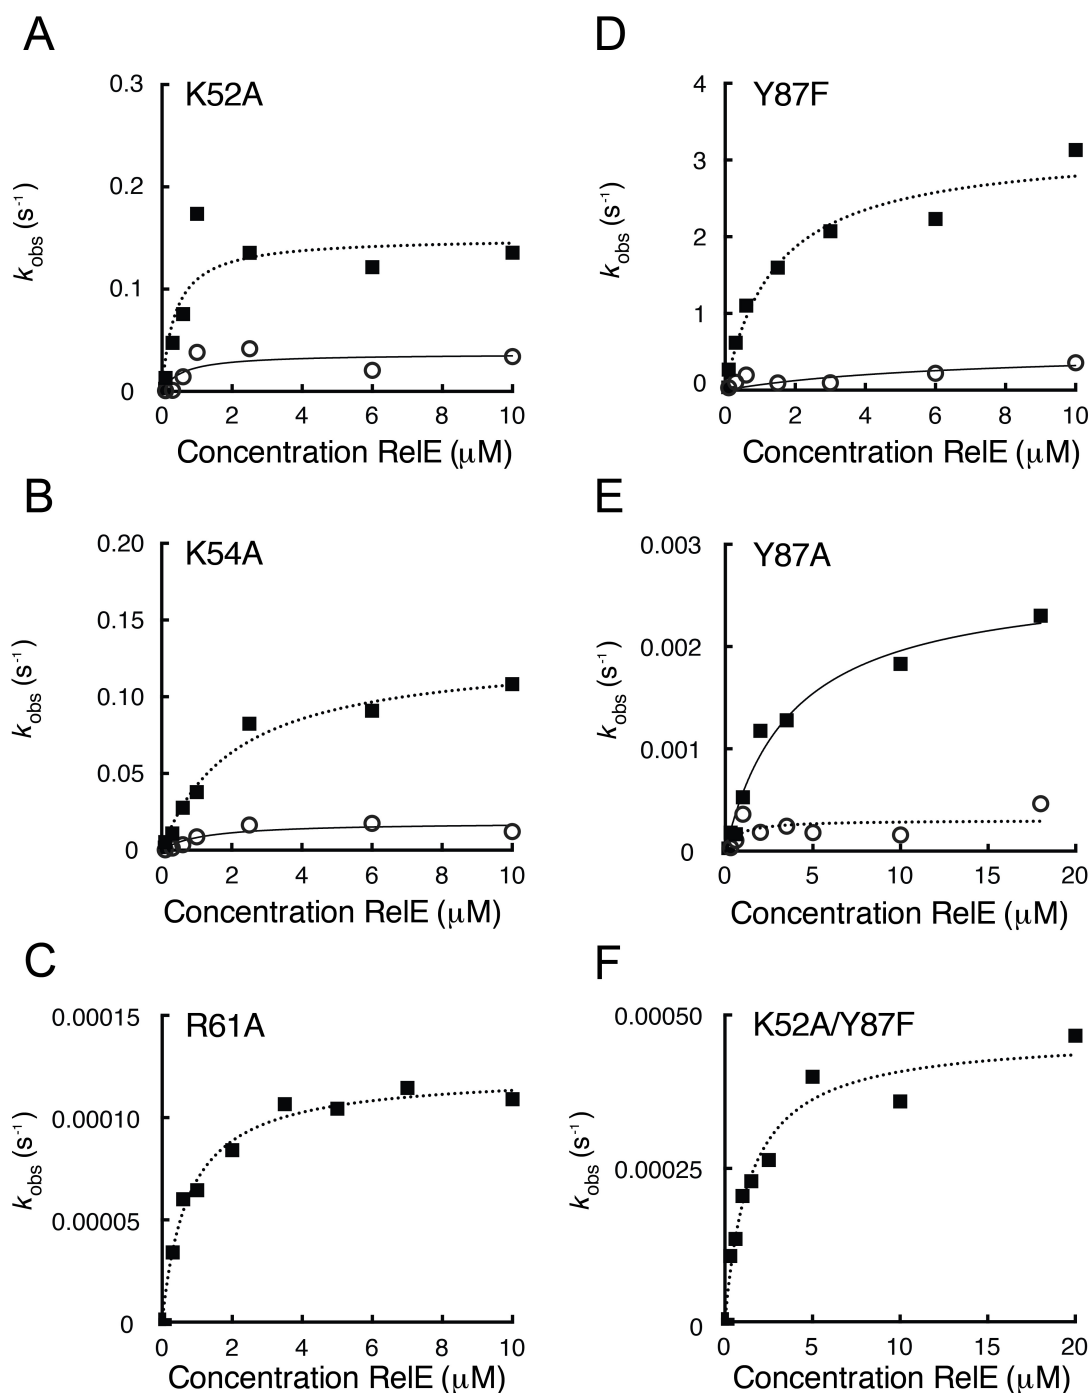

**Figure S3. Dependence of mutant single-turnover rates on enzyme concentration.** The rate,  $k_{\text{obs}}$  ( $\text{s}^{-1}$ ), for the fast (■) and slow phases (○) from a single replicate are plotted as a function of RelE concentration ( $\mu\text{M}$ ) for mutants (A) K52A, (B) K54A, (C) R61A, (D) Y87F, (E) Y87A, (F) K52A/Y87F. The rate constants ( $k_2$ ) and dissociation constants ( $K_d$ ) were extracted from hyperbolic fits of each replicate and the mean and SEM for each constant is listed in Table 1 and Table S1.

*Bacterial toxin RelE: A highly efficient nuclease with exquisite substrate specificity using atypical catalytic residues*

|           | $k_{2, \text{slow}} (\text{s}^{-1})^a$ | Fold Change <sup>b</sup> | $K_{d, \text{slow}} (\mu\text{M})^a$ |
|-----------|----------------------------------------|--------------------------|--------------------------------------|
| Wild type | 16 ± 2                                 |                          | 1.5 ± 0.3                            |
| K52A      | 0.038 ± 0.011                          | 4.2 x 10 <sup>2</sup>    | 0.63 ± 0.34                          |
| K54A      | 0.027 ± 0.016                          | 5.9 x 10 <sup>2</sup>    | 1.4 ± 0.8                            |
| R81A      | 0.00049 ± 0.00005                      | 3.2 x 10 <sup>4</sup>    | 0.42 ± 0.20                          |
| Y87F      | 0.27 ± 0.04                            | 5.9 x 10 <sup>1</sup>    | 1.0 ± 0.2                            |
| Y87A      | 0.00024 ± 0.00006                      | 6.6 x 10 <sup>4</sup>    | 0.43 ± 0.14                          |

<sup>a</sup> Values are the mean ± SEM from at least three independent determinations.

<sup>b</sup> Values calculated as the change in cleavage rate constants for each mutant relative to the wild-type rate.

**Table S1. Single-turnover mRNA cleavage rate constants and dissociation constants for wild-type and mutant RelE proteins.** The  $k_2$  and  $K_d$  values for the slow phase are reported as the mean ± SEM from at least three independent determinations. Fold changes were calculated as the change in cleavage rate constant for each mutant relative to the corresponding wild-type rate constant.
